# Supplementary material for: Dietary Supplementation with Sea Buckthorn Berry Puree Alters Plasma Metabolomic Profile and Gut Microbiota Composition in Hypercholesterolemia Population
Source: MDPI journal article supplement (doi:10.3390/foods11162481), 2022-08-17
Supplement: s1 [file s1]

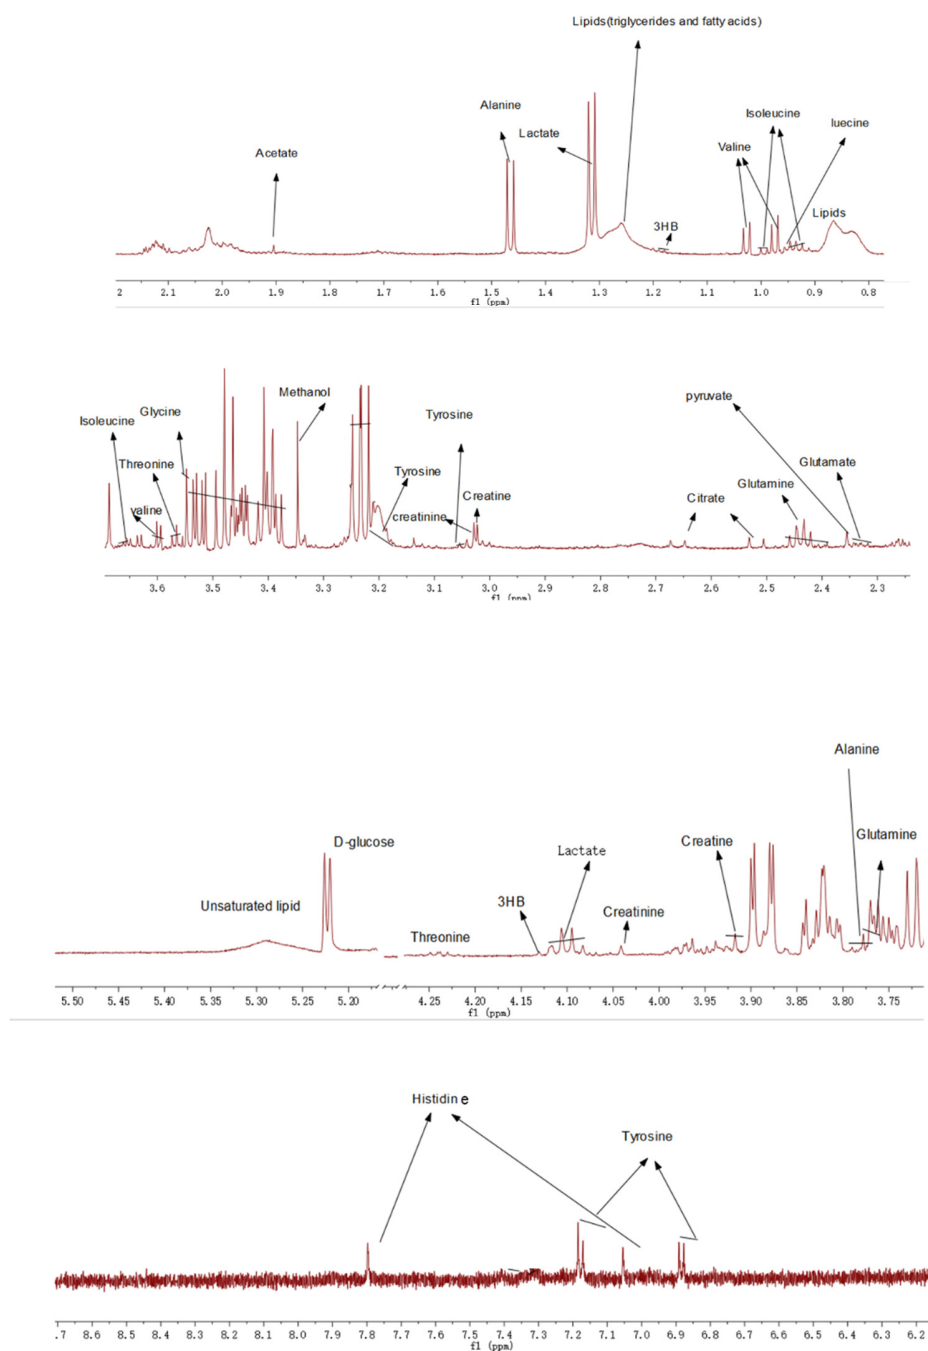

Figure S1 Representative CPMG spectrum of plasma samples

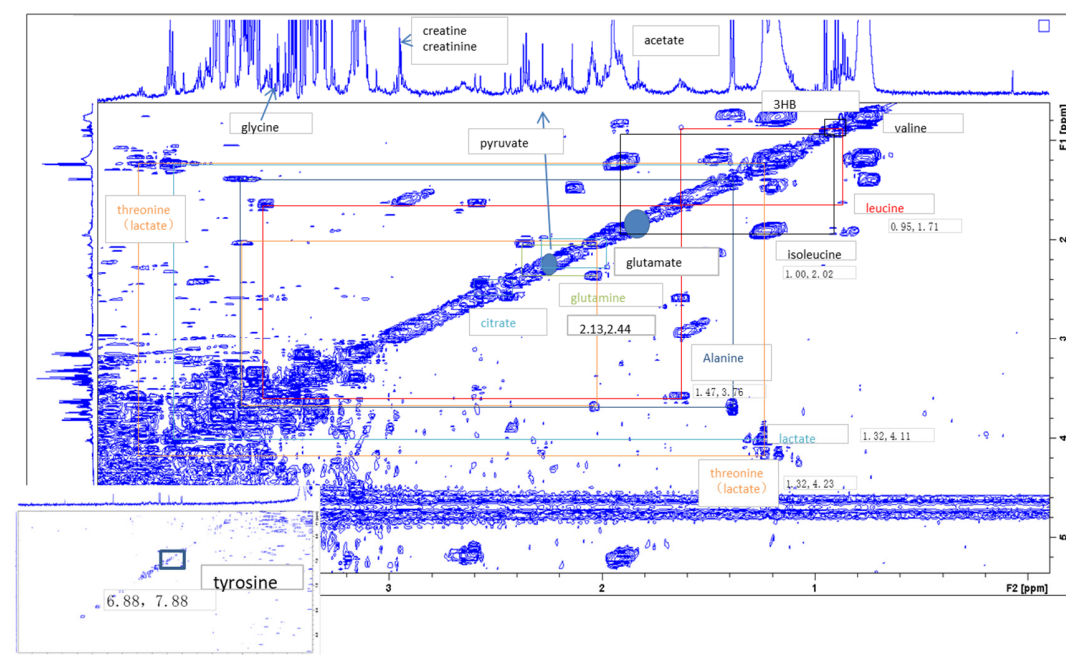

Figure S2 2D COSY spectrum

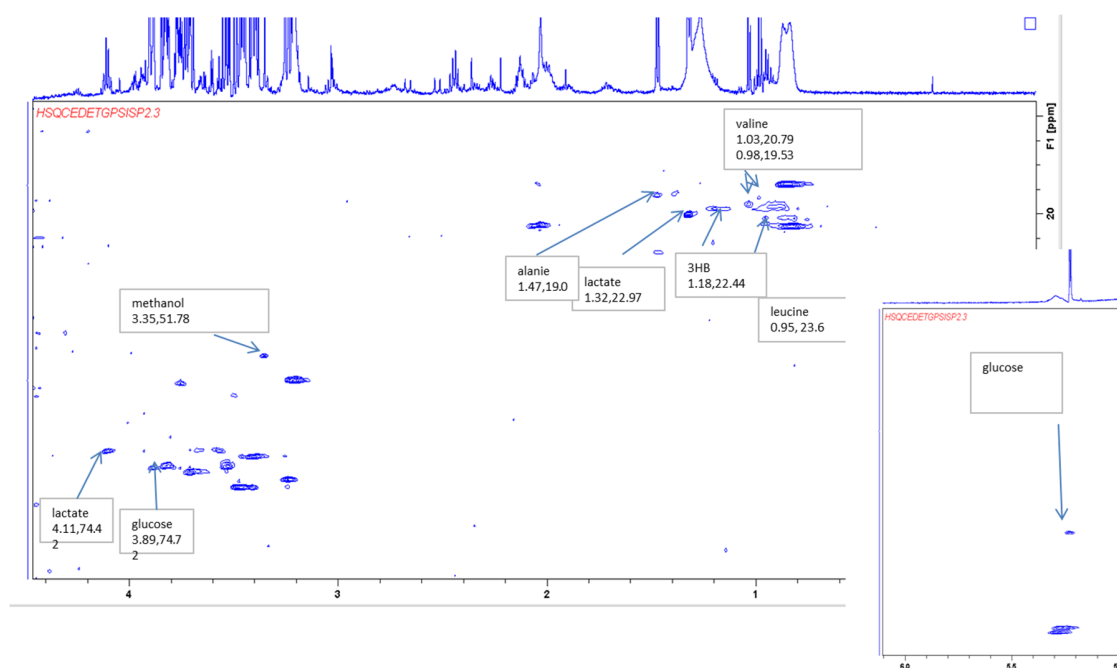

Figure S3 2D HSQC spectrum

Table S1 Chemical shifts and peak multiplicity of metabolites.

| No. | Metabolites              | $\delta^1\text{H}$ (multiplicity) | $\delta^{13}\text{C}$ | J value (Hz) | Methods        |
|-----|--------------------------|-----------------------------------|-----------------------|--------------|----------------|
| 1   | Lipids                   | 0.80-0.90(m)                      | —                     | —            | CPMG,COSY,HSQC |
| 2   | Isoleucine               | 0.94(t),1.00(d),1.24(m),3.66(d)   | —                     | —            | CPMG,COSY,HSQC |
| 3   | Valine                   | 0.98(d),1.03(d),2.26(m),3.60(d)   | 19.53,20.79           | 7.01,7.05    | CPMG,HSQC      |
| 4   | Leucine                  | 0.95(t),1.71(m),3.72(dd)          | 23.6                  | —            | CPMG,COSY,HSQC |
| 5   | 3-hydroxybutyrate (3-HB) | 1.18(d),4.15(m)                   | 22.44                 | 7            | CPMG,HSQC      |
| 6   | Lactate                  | 1.32(d), 4.11(q)                  | 22.97, 74.42          | 7            | CPMG,COSY,HSQC |
| 7   | Alanine                  | 1.47(d),3.76(q)                   | 19                    | 7.14         | CPMG,COSY,HSQC |
| 8   | Acetate                  | 1.91(s)                           | —                     | —            | CPMG,          |
| 9   | Glutamine                | 2.13(m),2.44(m)                   | —                     | —            | CPMG,COSY,     |
| 10  | Glutamate                | 2.05(m),2.34(m)                   | —                     | —            | CPMG,COSY      |
| 11  | Serine                   | 3.96(m), 3.83(dd)                 | —                     | 3.80         | —              |
| 12  | Pyruvate                 | 2.36(s)                           | —                     | —            | CPMG,JRES      |
| 13  | Citrate                  | 2.52(d),2.66(d)                   | —                     | 15.5,15.5    | CPMG,COSY      |
| 14  | Creatine                 | 3.02(s)                           | —                     | —            | CPMG           |
| 15  | Creatinine               | 3.03(s)                           | —                     | —            | CPMG           |
| 16  | Methanol                 | 3.35(s)                           | 51.78                 | —            | CPMG,HSQC      |
| 17  | Glycine                  | 3.55(s)                           | —                     | —            | CPMG           |
| 18  | Threonine                | 1.32(s),4.23(s)                   | —                     | —            | CPMG,COSY      |
| 19  | Unsaturated lipid        | 5.3 (b)                           | —                     | —            | —              |
| 20  | Glucose                  | 3.89(dd),5.226(d)                 | 74.7,95.2             | 3.88         | CPMG,HSQC      |
| 21  | Tyrosine                 | 6.88(d),7.88(d)                   | —                     | 8.8          | CPMG,COSY      |
| 22  | Histidine                | 7.06(s),7.80(s)                   | —                     | —            | CPMG           |

s = singlet; d = doublet; dd = double doublet; t = triplet; q = quartet; m = multiplet; br = broad peak
